# Supplementary material for: Explainable ensemble machine learning revealing spatiotemporal heterogeneity in driving factors of particulate nitro-aromatic compounds in eastern China
Source: Copernicus journal article supplement (doi:10.5194/acp-25-8407-2025), 2025-08-01
Supplement: Supplementary file 1 [file acp-25-8407-2025-supplement.pdf]

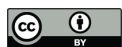

*Supplement of*

## **Explainable ensemble machine learning revealing spatiotemporal heterogeneity in driving factors of particulate nitro-aromatic compounds in eastern China**

**Min Li et al.**

*Correspondence to:* Xinfeng Wang ([xinfengwang@sdu.edu.cn](mailto:xinfengwang@sdu.edu.cn))

The copyright of individual parts of the supplement might differ from the article licence.

## S1. Site description and online instruments

Field observations were performed at eleven sites in eastern China, including four urban sites in Jinan, Guangzhou, Nanjing, and Beijing, five rural sites in Dongying, Wangdu, Yucheng, and Qingdao (including two sampling sites: Qingdao Campus of Shandong University and Entrepreneurship Center of Blue Silicon Valley), and two mountain sites at Mount Tai and Mount Lao (seen in Figure 1). Detailed information on sampling sites and online measurements is available below, with the specific sampling periods for each field campaign illustrated in Table S1. As indicated, three field campaigns were conducted in spring, six in summer, two in autumn, and five in winter.

The Jinan site is situated at the Urban Atmospheric Environment Observation Station (~22 m above ground level) of Shandong University in Jinan, Shandong Province. Jinan, a major industrialized city in North China, has a sampling site characterized by intensive traffic, commercial and residential activities nearby, and extensive industrial facilities. Trace gases, including SO<sub>2</sub>, NO<sub>2</sub>, and O<sub>3</sub>, were monitored with online gas analyzers (Thermo Electronic Corporation, TEC, Model 43C, 42C, and 49C, respectively) and meteorological data were recorded by an automatic meteorological station (CAWS600, Huayun, China). Details about this site were given by Wang et al. (2017b).

The southernmost Guangzhou site is located at the Guangzhou Institute of Geochemistry, Chinese Academy of Sciences in Guangzhou, Guangdong Province. This site is surrounded by education and residential districts, with two heavily trafficked expressways nearby. Related site information was provided by Bi et al. (2016).

The Nanjing site is situated at the Station for Observing Regional Processes of the Earth System (SORPES) in the Xianlin Campus of Nanjing University in Nanjing, Jiangsu Province. Nanjing is a megacity city that dominated by tertiary industries such as finance and software. This site is less influenced by industrial emissions in the vicinity but it is adjacent to the G25 Freeway (~300 m) and G312 National Road (~1.8 km), which may potentially affect the air pollution levels at the sampling location. A more detailed description of this station can be found in a previous study by Ding et al. (2013).

The Beijing site is located at the Chinese Research Academy of Environmental Sciences (CRAES), an urban site with education and residential districts and heavy traffic. As described by Ren et al. (2021), this area was significantly affected by anthropogenic activities and direct emissions. Meteorological parameters, as well as gaseous tracers, were determined simultaneously by employing automated instruments (Chinese Research Academy of Environmental Sciences Supersite for Urban Air Comprehensive Observation and Research).

The Dongying site, where PM<sub>2.5</sub> samples were collected, is situated at the Yellow River Delta Ecology Research Station of Coastal Wetland, Chinese Academy of Sciences. It is a typical rural site that located at the mouth of the Yellow River, characterized by minimal local anthropogenic emissions. Related tracer gases of SO<sub>2</sub>, NO<sub>2</sub>, and O<sub>3</sub> were measured by Model 43C (TEC), Model T500U (Teledyne Advanced Pollution Instrumentation, API), and Model 49C (TEC) analyzers,

respectively. Meteorological data were also measured online (JZYG, PC-4, China). Detailed information on this site was given by Zhang et al. (2019).

The Wangdu site is located in a rural area of Baoding, Hebei province. The immediate vicinity (within 5 km) of the sampling site consists predominantly of agricultural land. However, this site is affected by anthropogenic emissions from nearby urban cities, such as Beijing, Tianjin, and Shijiazhuang. Trace gases of NO<sub>2</sub> and O<sub>3</sub> were monitored online using a Model 42i analyzer and a Model 49i analyzer (TEC), respectively, while SO<sub>2</sub> was determined by a pulsed UV fluorescence analyzer. Moreover, meteorological parameters were measured using a weather station. More information on the site can be found in Tham et al. (2016).

The measurements conducted at the Yucheng site, situated at the Chinese Academy of Sciences Comprehensive Station, Dezhou, Shandong province. The sampling site is surrounded by agricultural land, but there is the G308 highway located 1.5 km south of the site. Trace gases, including NO<sub>2</sub>, O<sub>3</sub>, and SO<sub>2</sub> were detected online with Model 42C, 49C, 43C analyzer (TEC), respectively. Data on meteorological parameters were provided by an automatic meteorological station (Model MILOS520, Vaisala, Finland). And details about the site were described by Yao et al. (2016).

The two sampling sites situated in coastal areas in Qingdao are Qingdao Campus of Shandong University and Entrepreneurship Center of Blue Silicon Valley. The two sites are in close proximity to each other, with a linear distance of only 2.2 km (shown in Fig. 1b). They are surrounded by educational and residential districts, villages, and farmlands. As typical rural coastal areas, the two sites are influenced by both anthropogenic and natural sources. Specially, the concentrations of SO<sub>2</sub>, NO<sub>2</sub>, and O<sub>3</sub> were measured in real time by gas analyzers (Model 43i, 42i, and 49i, respectively). More information on this sampling site can be seen in our previous study (Liu et al., 2022).

The measurement site located on Mount Tai in Tai'an city, Shandong Province, is the highest point in the Northern China Plain, making it an ideal place for studying the transport, sources, and formation processes of air pollutants in northern China. This mountaintop lacks significant local anthropogenic emissions but is influenced by air masses transport processes in the region. Trace gases were recorded using online gas analyzers (Model 43C, Model T200/T500U, and Model T400U for SO<sub>2</sub>, NO<sub>2</sub>, and O<sub>3</sub>, respectively), and meteorological data were obtained from Taishan National Reference Climatological Station. Detailed descriptions of this site were given by Wang et al. (2017c).

The sampling site on Mount Lao is situated in the southeastern part of the Shandong Peninsula in Shandong Province, with a straight-line distance of about 1 km from the coastline. This site is adjacent to a dedicated tourist road and surrounded by several villages, restaurants, and guesthouses. Therefore, Mount Lao is an ideal location for studying the impact of land-sea exchanges on atmospheric pollution characteristics in coastal regions at different scales. In addition, online gas analyzers (Thermo Scientific, U.S.A.) were used to determine the concentrations of trace gases, and meteorological parameters were measured by an ultrasonic automatic weather station (RS-FSXCS-N01-1, China).

## S2. Aerosol surface area density (Sa) prediction

Considering the complex relationship of Sa with particle mass concentrations, humidity, and temperature, this study established a prediction model based on random forest (RF) training algorithm due to its superior predictive capability to obtain Sa data from different sampling sites. First, increased particle concentrations typically contribute to larger Sa in the ambient atmosphere (Quinn et al., 2008). Additionally, higher RH facilitates hygroscopic growth of aerosols, which should also be taken into account (Sinclair et al., 1974). Meteorological conditions, such as temperature, also affect the suspension and deposition of aerosols, indirectly impacting Sa levels significantly (Chen et al., 2019). Consequently, the observational Sa data (hourly from 1 December to 31 December, 2019;  $n = 724$ ) at Mount Tai served as target variables for training, while  $PM_{2.5}$  concentrations, RH, and T were selected as input features. The entire dataset was randomly divided into two parts: 80% for training and RF model development, and 20% reserved for evaluation. The optimal RF model hyperparameters were set to 180 decision trees and a maximum tree depth of 13. To quantitative verify the accuracy and precision of the trained RF model, we compared the observed and simulated Sa (only test data set) and found that they exhibited a strong correlation, with the  $R^2$  of 0.90, RMSE of  $27.07 \mu m^2 cm^{-3}$ , and MAE of  $20.75 \mu m^2 cm^{-3}$  (shown in Fig. S1). This suggested that the trained RF model is applicable for simulating Sa concentrations at other sites, with the simulated Sa data presented in Fig. S2. It needs to note that the estimated Sa data for different sampling sites in this study inherently propagate potential uncertainties into the subsequent prediction results of particulate NACs with the ensemble machine learning model.

## S3. Analytical method of NACs

$PM_{2.5}$  filter samples were extracted either ultrasonically or using a thermostatic orbital shaker, with methanol containing 30  $\mu L$  saturated EDTA solution three times for 30 min under a constant temperature condition of  $18^\circ C$  and settled for more than 12 h. Then, the extracts were filtered through a  $0.20 \mu m$  PTFE membrane syringe filter to remove insoluble impurity. The resulting clear filtrate was evaporated and concentrated with a gentle stream of nitrogen. Finally, the residue was reconstituted to a final volume of 300  $\mu L$  with methanol containing the internal standard (100  $ng mL^{-1}$  4-nitrophenol-2,3,5,6- $d_4$  used for mountain sites and rural Qingdao, 200  $ng mL^{-1}$  2,4,6-trinitrophenol used for the remaining sites) for further qualitative and quantitative analysis.

NACs in the extracts were then analyzed by using UHPLC-MS equipped with ESI source. The separation of different NACs (only for mountain sites and rural Qingdao) was performed with an Acquity UPLC HSS T3 column ( $2.1 mm \times 100 mm$ ,  $1.8 \mu m$  particle size,  $100\text{\AA}$ , Waters, U.S.A.) with a VanGuard column (HSS T3,  $1.8 \mu m$ ) at a flow rate of  $0.19 mL min^{-1}$ . The mobile phase contained eluent A (ultrapure water with 0.1% acetic acid) and eluent B (methanol with 0.1% acetic acid). The gradient program was set as follows: eluent A was initially 99% and kept at 99% for 2.7 min, then gradually decreased to 46% with 12.5 min and kept at 46% for 1 min, and then decreased to 10% with 7.5 min and held for 0.2 min. After that, eluent A increased to 99% in 1.8 min and kept at 99% for the last 17.3 min before the next sample solution. For the remaining sampling

95 sites, the NACs were separated using an Atlantis T3 C18 column (2.1 mm × 150 mm, 3.0 μm particle size, 100Å, Waters, U.S.A.) coupled with a VanGuard column (Atlantis T3, 3.0 μm) at a flow rate of 0.2 mL min<sup>-1</sup>. The mobile phase consisted of 11% acetonitrile and 0.1% formic acid in ultrapure water (eluent A) and 11% acetonitrile in methanol (eluent B). The proportion of eluent A started with 66%, and then decreased to 44% within 19 min and was kept at 44% for 4min. Finally, it returned to 66% for the last 8 min. The blank samples were extracted and analyzed in the same procedure.

100 The ESI source was operated in negative mode and eight mass-to-charge ratios including 138, 152, 154, 166, 168, 182, 183, and 197 amu were monitored in real time. Then target NACs were then identified by comparing individual retention times and mass spectra with standard mixtures: NPs (4-nitrophenol (4NP), 3-methyl-4-nitrophenol (3M4NP), 2-methyl-4-nitrophenol (2M4NP), and 2,6-dimethyl-4-nitrophenol (2,6DM4NP)), NCs (4-nitrocatechol (4NC), 4-methyl-5-nitrocatechol (4M5NC), 3-methyl-6-nitrocatechol (3M6NC), and 3-methyl-5-nitrocatechol (3M5NC)), NSAs (5-nitrosalicylic acid (5NSA) and 3-nitrosalicylic acid (3NSA)), and DNPs (2,4-dinitrophenol (2,4DNP) and 4-methyl-2,6-dinitrophenol (4M2,6DNP)). Finally, the twelve NACs were quantified using multi-point standard curves ( $R^2 > 0.99$ ) based on gradient standard mixtures.

105 Furthermore, in this study, all reported data in the sample filters were blank-corrected.

#### S4. Positive Matrix Factorization (PMF) analysis

To obtain the potential factor profiles and contributions on NACs, in this study, two to six factors were tested for calculation and evaluation. The difference between  $Q_{\text{true}}$  provided by the model and calculated  $Q_{\text{robust}}$ , which calculated by the following Eq. (S1), is used to determine the optimal number of factors for the calculation (Hong et al., 2022; Wu et al., 2020):

$$110 \quad Q_{\text{robust}} = m \times n - p(m \times n) \quad (\text{S1})$$

where  $m$  is the input sample numbers,  $n$  refers to the number of input species, and  $p$  refers to the number of factors. The changes in the  $Q_{\text{true}}/Q_{\text{robust}}$  ratio values for PMF solutions with 2–6 factors are shown in the Fig. S3. The  $Q_{\text{true}}/Q_{\text{robust}}$  value decreased slowly after four factors, so a four-factor solution was chosen as best choice.

115 As shown in Fig. S4, the major contributions of factor 1 were 4NP (84.9%), 3M4NP (73.7%), and 2M4NP (85.2%). As reported by Lu et al. (2019a), remarkable amounts of NPs were detected in particles from residential coal combustion plumes, with emission factors ranging from 0.01 to 0.94 mg kg<sup>-1</sup>.

Factor 2 is featured with the highest loading and contribution (87.3%) of NO<sub>2</sub> and is determined as traffic emissions (TE). Previous studies have indicated that NACs can be directly emitted from traffic activities, with emission factors to be 0.68–89.61 μg km<sup>-1</sup> (Trempe et al., 1993; Schauer et al., 2002; Lu et al., 2019b), due to the hydrocarbons, polycyclic aromatic hydrocarbons and nitro-polycyclic aromatic hydrocarbons fuel combusting in the engine (Zhang et al., 2014; Cao et al., 2017).

120

Factor 3 is characterized by high contributions of 4NC (56.6%), 4M5NC (84.7%), and 3M6NC (83.9%), which are significant tracers for biomass burning smoke (Iinuma et al., 2010; Claeys et al., 2012), and thus this factor is confirmed as biomass

burning (BB). This factor has been considered to be an important source of NACs in recent years that mainly produced by the pyrolysis of lignin (Simoneit et al., 2007). The emission factors of fine NACs from biomass burning were estimated to be 0.75-11.1 mg kg<sup>-1</sup> (Wang et al., 2017a).

Factor 4 is distinguished by high levels of O<sub>3</sub> (91.4%) along with 5NSA (80.0%) and 3NSA (86.9%), and is recognized as secondary formation associated with gas-phase reaction (GR). Atmospheric O<sub>3</sub> is the major source of OH radicals, which dominate the secondary formation of NACs from precursors (Harrison et al., 2005). Additionally, field observations and experimental studies have confirmed that NSAs primarily originate from secondary oxidations in the gas phase (Wang et al., 2018; Yuan et al., 2021).

## **S5. Ensemble machine learning model**

### **S5.1. Base models**

Random forest (RF) is an ensemble learning technique that constructs multiple decision trees based on bagging theory (Breiman, 2001). RF improves predictive accuracy and controls overfitting by averaging the results of multiple trees, each built from a random subset of the data. This method enhances model robustness, reduces variance, and makes it well-suited for handling large datasets with complex interactions (Requia et al., 2020). Its inherent feature importance evaluation also provides insights into the significance of various predictors (Petkovic et al., 2017).

Extreme gradient boosting (XGBoost), a gradient boosting algorithm, optimizes model performance by sequentially building and combining decision trees. XGBoost incorporates regularization techniques to prevent overfitting and utilizes parallel processing for efficiency, effectively handling large datasets and complex relationships. The XGBoost model has the advantage of superior predictive capabilities and computational efficiency (Fatahi et al., 2022; Gui et al., 2020).

Similar to the XGBoost model, the light gradient boosting machine (LightGBM) is also a gradient boosting technique that leverages tree-based learning algorithms. It utilizes a histogram-based approach for efficient training, significantly reducing computation time and memory usage (Ke et al., 2017). LightGBM handles large datasets and complex features with high accuracy by employing techniques such as gradient-based one-side sampling and exclusive feature bundling. Its advantages include faster training speed, lower memory consumption, and effective handling of categorical features, which collectively enhance predictive performance and scalability (Kang et al., 2021; Ju et al., 2019; Pham et al., 2021).

Multilayer perceptron (MLP) algorithm is a feedforward neural network consisting of an input layer, one or more hidden layers, and an output layer. Each layer is fully connected to the subsequent layer, and MLP uses backpropagation to adjust weights and biases during training. This model can achieve flexibility in modelling intricate data structures, adaptability to various types of tasks, and effectiveness in both regression and classification problems (Reifman and Feldman, 2002; Wang et al., 2023).

The performance of ML approaches is significantly dependent on the hyperparameters, and the optimal values of tuning hyperparameters for the four base learners (RF, XGBoost, LightGBM, and MLP) are listed in Table S2.

## 155 S5.2. Evaluation index

The coefficient of determination ( $R^2$ ) evaluates the performance of regression model and quantifies how well the independent variables explain the variability of the dependent variable.  $R^2$  can be calculated according to the Eq. (S2) to (S4) (Spiess and Neumeyer, 2010):

$$R^2 = 1 - \frac{SS_{res}}{SS_{tot}} \quad (S2)$$

$$160 \quad SS_{res} = \sum_{i=1}^n (y_i - \hat{y}_i)^2 \quad (S3)$$

$$SS_{tot} = \sum_{i=1}^n (y_i - \bar{y})^2 \quad (S4)$$

Root Mean Squared Error (RMSE) measures the square root of the average of the squared differences between the observed actual outcomes and the predictions. Mean Absolute Error (MAE) calculates the average of the absolute differences between the observed actual outcomes and the predictions. Moreover, lower RMSE and MAE values indicate better model performance,

165 and the formulas are as follows (Chai and Draxler, 2014):

$$RMSE = \sqrt{\frac{1}{n} \sum_{i=1}^n (y_i - \hat{y}_i)^2} \quad (S5)$$

$$MAE = \frac{1}{n} \sum_{i=1}^n |y_i - \hat{y}_i| \quad (S6)$$

where  $SS_{res}$  is the residual sum of squares,  $SS_{tot}$  is total sum of squares,  $y_i$  and  $\hat{y}_i$  are the observed and predicted values, respectively,  $\bar{y}$  is the mean of observed values, and  $n$  is the number of samples.

## 170 S5.3. SHAP interpretability

Shapley Additive Explanations (SHAP), originating from cooperative game theory (Shapley, 1997), explains the importance of individual features in ML models by evaluating their marginal contributions with SHAP values (Ancona et al., 2019). For each predicted sample, SHAP fairly distributes the contribution values among all features, providing a comprehensive understanding of the relationship between the features and predictions (Hou et al., 2022), as shown in Eq. (S7):

$$175 \quad f(x) = \varphi_0(f) + \sum_{i=1}^M \varphi_i \quad (S7)$$

where  $f(x)$  denotes the predicted value for each sample,  $\varphi_0(f)$  is the expected concentration of the model prediction ( $f$ ) on all samples,  $M$  is the number input features, and  $\varphi_i$  is interpreted as Shapley value of  $i$ -th factor, which represents the contribution of feature  $i$  and can be expressed as Eq. (8):

$$\varphi_i = \sum_{S \subseteq \{1, 2, \dots, M\} \setminus \{i\}} \frac{|S|!(M-|S|-1)!}{M!} [f(S \cup \{i\}) - f(S)] \quad (\text{S8})$$

180 where  $S$  is a subset of features excluding feature  $i$ ,  $f(S \cup \{i\})$  is the model prediction when features in subset  $S$  and feature  $i$  are included, and  $f(S)$  is the model prediction when only features in subset  $S$  are included.



Table S1. Sampling sites and sampling periods involved in this study.

| Sampling site    | Site type | Sampling period       | Season | Number of samples | Detected species                      |
|------------------|-----------|-----------------------|--------|-------------------|---------------------------------------|
| <i>Jinan</i>     | urban     | 2016.04.12-2016.04.27 | spring | 9                 | 1, 2, 3, 4, 5, 6, 7, 8, 9, 10, 11, 12 |
|                  |           | 2014.09.04-2014.09.21 | summer | 37                | 1, 2, 3, 5, 6, 7, 8, 9, 10            |
|                  |           | 2016.06.27-2016.07.11 |        |                   | 1, 2, 3, 4, 5, 6, 7, 8, 9, 10, 11, 12 |
|                  |           | 2017.10.22-2017.11.01 | autumn | 20                | 1, 2, 3, 4, 5, 6, 7, 8, 9, 10, 11, 12 |
|                  |           | 2013.11.26-2014.01.05 | winter | 16                | 1, 2, 3, 4, 5, 6, 7, 8, 9, 10, 11, 12 |
| <i>Guangzhou</i> | urban     | 2016.02.19-2016.03.07 |        |                   | 1, 2, 3, 5, 6, 7, 8, 9, 10            |
| <i>Nanjing</i>   | urban     | 2017.06.28-2017.07.08 | summer | 20                | 1, 2, 3, 4, 5, 6, 7, 8, 9, 10, 11, 12 |
| <i>Beijing</i>   | urban     | 2017.10.22-2017.10.31 | autumn | 16                | 1, 2, 3, 4, 5, 6, 7, 8, 9, 10, 11, 12 |
| <i>Yucheng</i>   | rural     | 2018.01.15-2018.01.31 | winter | 14                | 1, 2, 3, 4, 5, 6, 7, 8, 9, 10, 11, 12 |
| <i>Wangdu</i>    | rural     | 2014.06.09-2014.06.20 | summer | 16                | 1, 2, 3, 5, 6, 7, 8, 9, 10            |
| <i>Dongying</i>  | rural     | 2014.06.19-2014.06.29 | summer | 18                | 1, 2, 3, 5, 6, 7, 8, 9, 10            |
|                  |           | 2017.06.04-2017.06.15 | summer | 10                | 1, 2, 3, 4, 5, 6, 7, 8, 9, 10, 11, 12 |
| <i>Qingdao</i>   | rural     | 2017.01.15-2017.01.23 | winter | 9                 | 1, 2, 3, 4, 5, 6, 7, 8, 9, 10, 11, 12 |
|                  |           | 2019.01.10-2019.02.23 | winter | 132               | 1, 2, 3, 4, 5, 6, 7, 8, 9, 10, 11, 12 |
|                  |           | 2019.11.11-2019.12.25 |        |                   | 1, 2, 3, 4, 5, 6, 7, 9, 10, 11, 12    |
|                  |           | 2018.03.22-2018.04.05 | spring | 25                | 1, 2, 3, 4, 5, 6, 7, 8, 9, 10, 11, 12 |
| <i>Mount Tai</i> | mountain  | 2014.07.27-2014.08.06 | summer | 17                | 1, 2, 3, 5, 6, 7, 8, 9, 10            |
|                  |           | 2017.11.28-2017.12.09 | winter | 157               | 1, 2, 3, 4, 5, 6, 7, 8, 9, 10, 11, 12 |
|                  |           | 2019.12.01-2019.12.31 |        |                   | 1, 2, 3, 4, 5, 6, 7, 8, 9, 10, 11, 12 |
| <i>Mount Lao</i> | mountain  | 2021.04.16-2021.05.19 | spring | 97                | 1, 2, 3, 4, 5, 6, 7, 8, 9, 10, 11, 12 |

NOTE: <sup>1</sup> 4-nitrophenol (4NP). <sup>2</sup> 3-methyl-4-nitrophenol (3M4NP). <sup>3</sup> 2-methyl-4-nitrophenol (2M4NP). <sup>4</sup> 2,6-dimethyl-4-nitrophenol (2,6DM4NP). <sup>5</sup> 4-nitrocatechol (4NC). <sup>6</sup> 4-methyl-5-nitrocatechol (4M5NC). <sup>7</sup> 3-methyl-6-nitrocatechol (3M6NC). <sup>8</sup> 3-methyl-5-nitrocatechol (3M5NC). <sup>9</sup> 5-nitrosalicylic acid (5NSA). <sup>10</sup> 3-nitrosalicylic acid (5NSA). <sup>11</sup> 2,4-dinitrophenol (2,4DNP). <sup>12</sup> 4-methyl-2,6-dinitrophenol (4M2,6DNP).

Table S2. Hyperparameter settings for four base learners.

| Model                                         | Hyperparameters                                              | Value                                         |
|-----------------------------------------------|--------------------------------------------------------------|-----------------------------------------------|
| Random forest<br>(RF)                         | Number of trees                                              | 300                                           |
|                                               | Maximum tree depth                                           | 10                                            |
|                                               | Minimum number of samples required to split an internal node | 4                                             |
|                                               | Minimum number of samples required to be at a leaf node      | 2                                             |
| Extreme Gradient Boosting<br>(XGBoost)        | Number of trees                                              | 300                                           |
|                                               | Maximum tree depth                                           | 3                                             |
|                                               | Learning rate                                                | 0.1                                           |
|                                               | Subsample                                                    | 0.8                                           |
|                                               | Colsample_bytree                                             | 1.0                                           |
| Light Gradient Boosting Machine<br>(LightGBM) | Number of trees                                              | 400                                           |
|                                               | Maximum tree depth                                           | 5                                             |
|                                               | Learning rate                                                | 0.1                                           |
|                                               | Subsample                                                    | 0.6                                           |
|                                               | Colsample_bytree                                             | 0.6                                           |
|                                               | Number of leaves                                             | 20                                            |
| Multilayer Perceptron<br>(MLP)                | Hidden layer and the number of neurons                       | 1 hidden layer with 100 neurons in each layer |
|                                               | Activation function                                          | relu                                          |
|                                               | L2 regularization                                            | $10^{-4}$                                     |
|                                               | Tolerance for the optimization                               | $10^{-4}$                                     |

**Table S3. Evaluation index results of NPs, NCs, and NSAs for the EML model.**

| <b>Compounds</b>            | <b>RMSE</b> | <b>MAE</b> | <b>CV-R<sup>2</sup></b> |
|-----------------------------|-------------|------------|-------------------------|
| Nitrophenols (NPs)          | 5.49        | 3.13       | 0.90                    |
| Nitrocatechols (NCs)        | 4.96        | 2.97       | 0.85                    |
| Nitrosalicylic acids (NSAs) | 0.63        | 0.44       | 0.93                    |

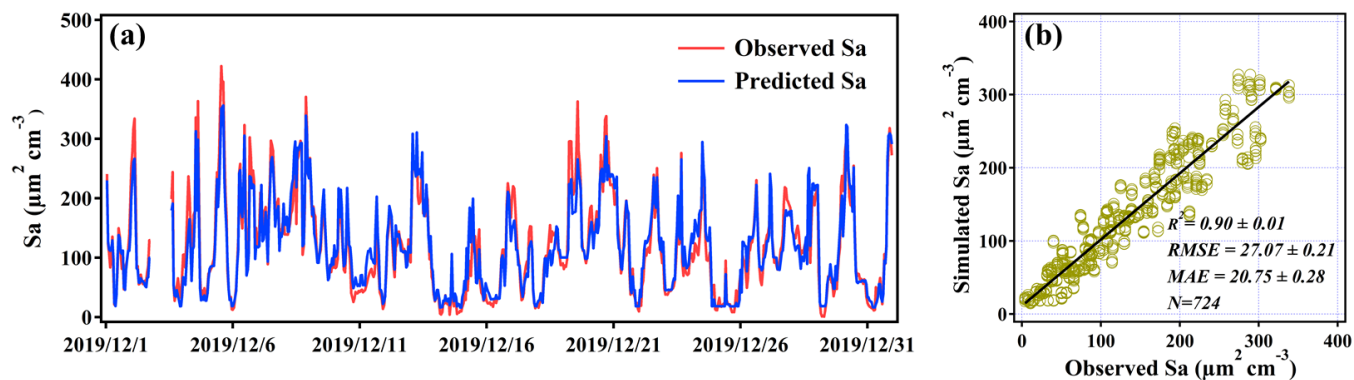

Fig. S1. (a) Time series of RF model simulated and observed  $Sa$  data during the winter period at Mount Tai. (b) The linear fit between observed and RF model simulated  $Sa$  data (obtained after repeating the model five times).

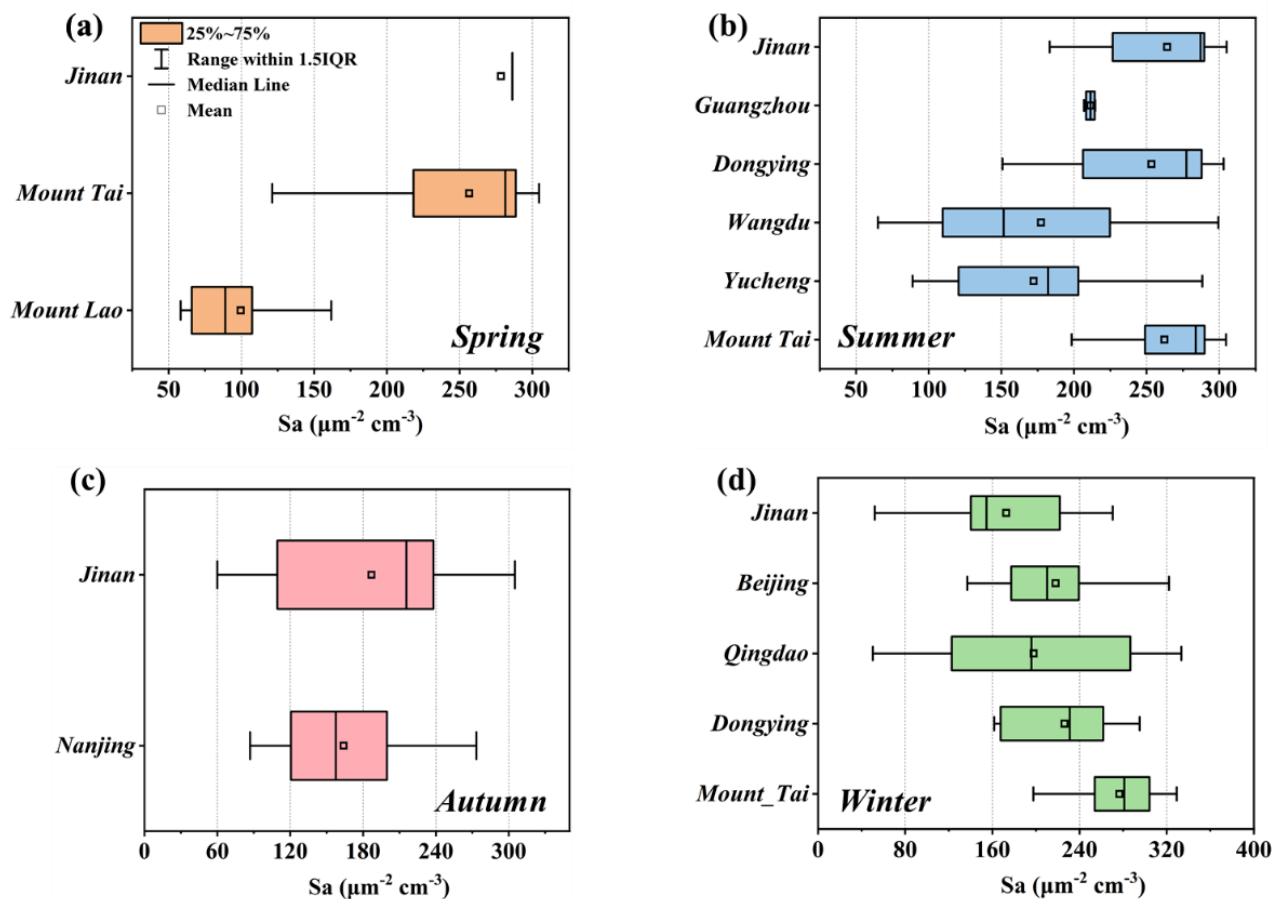

Fig. S2. The simulated  $Sa$  data based on trained RF model in (a) spring, (b) summer, (c) autumn, and (d) winter at different sampling sites, respectively.

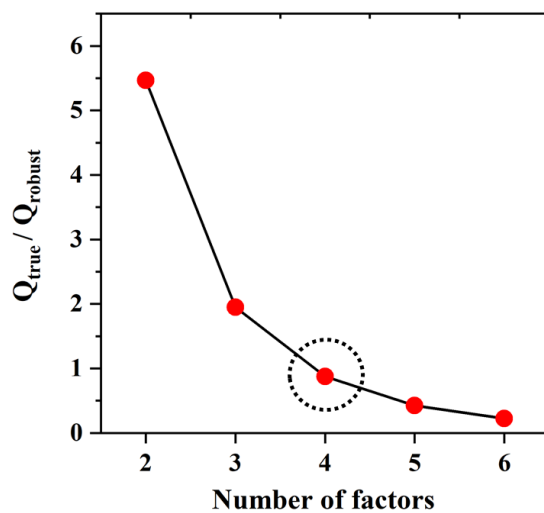

200 Fig. S3.  $Q_{\text{true}}/Q_{\text{robust}}$  ratios changes with the number of factors.

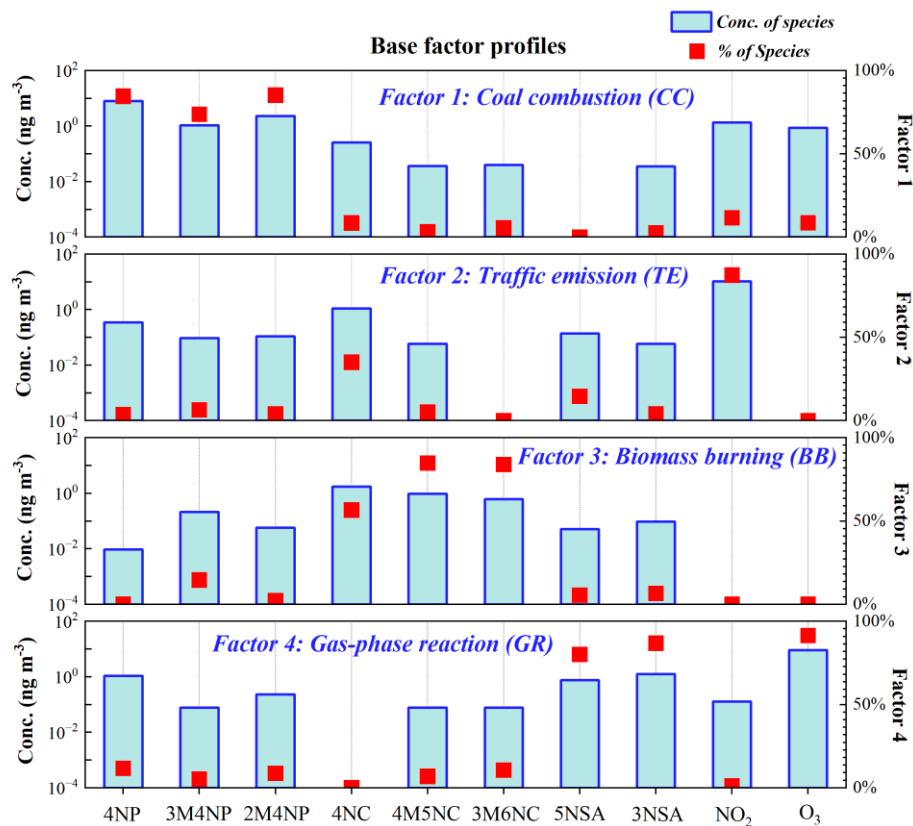

Fig. S4. Source profile of resolved factors by PMF model.

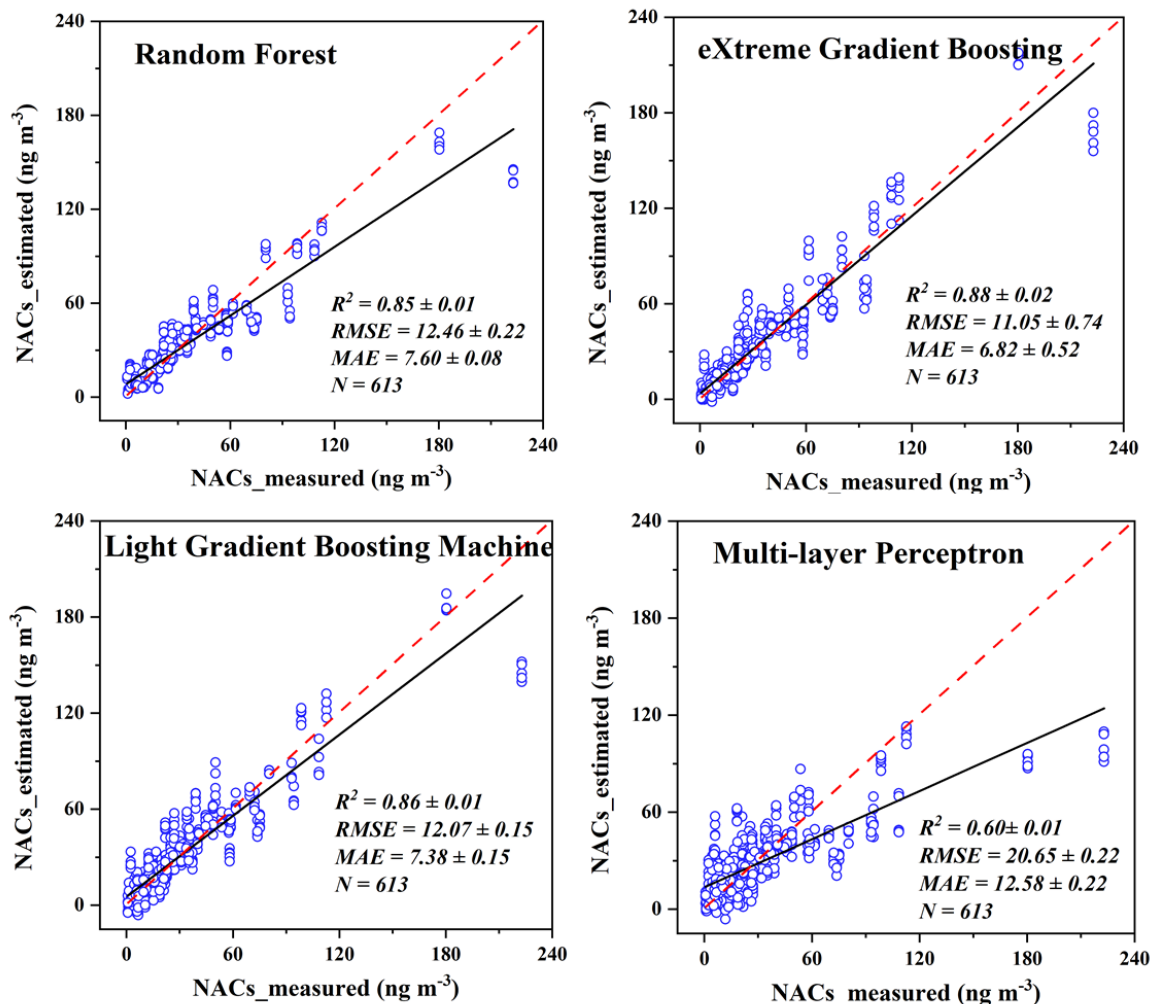

Fig. S5. The scatter plots of cross-validation results for simulated and observed NACs on the testing data (obtained after repeating the model five times) by different base models. The red dashed line denotes the best fit line.

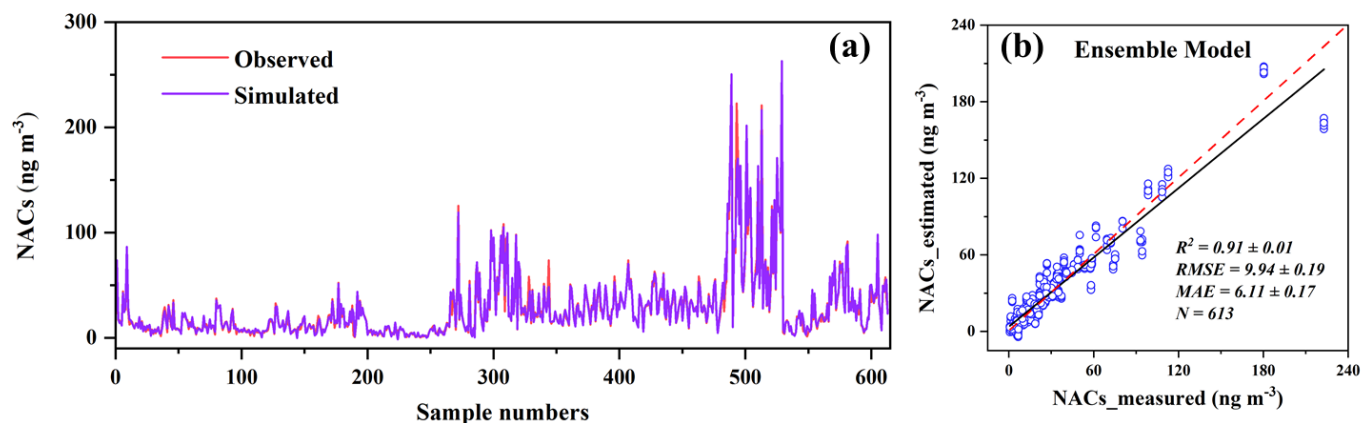

Fig. S6. (a) Comparison of EML simulated and observed NACs concentrations for all samples. (b) The scatter plots of cross-validation results for simulated and observed NACs on the testing data (obtained after repeating the model five times) by ensemble machine learning.

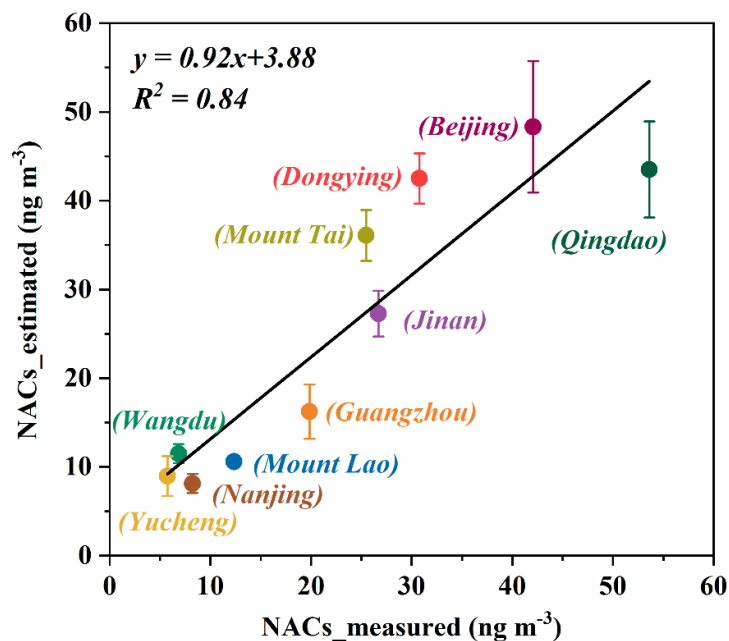

Fig. S7. Comparison of observed and simulated NACs at different sites with a leave-one-site-out cross-validation approach.

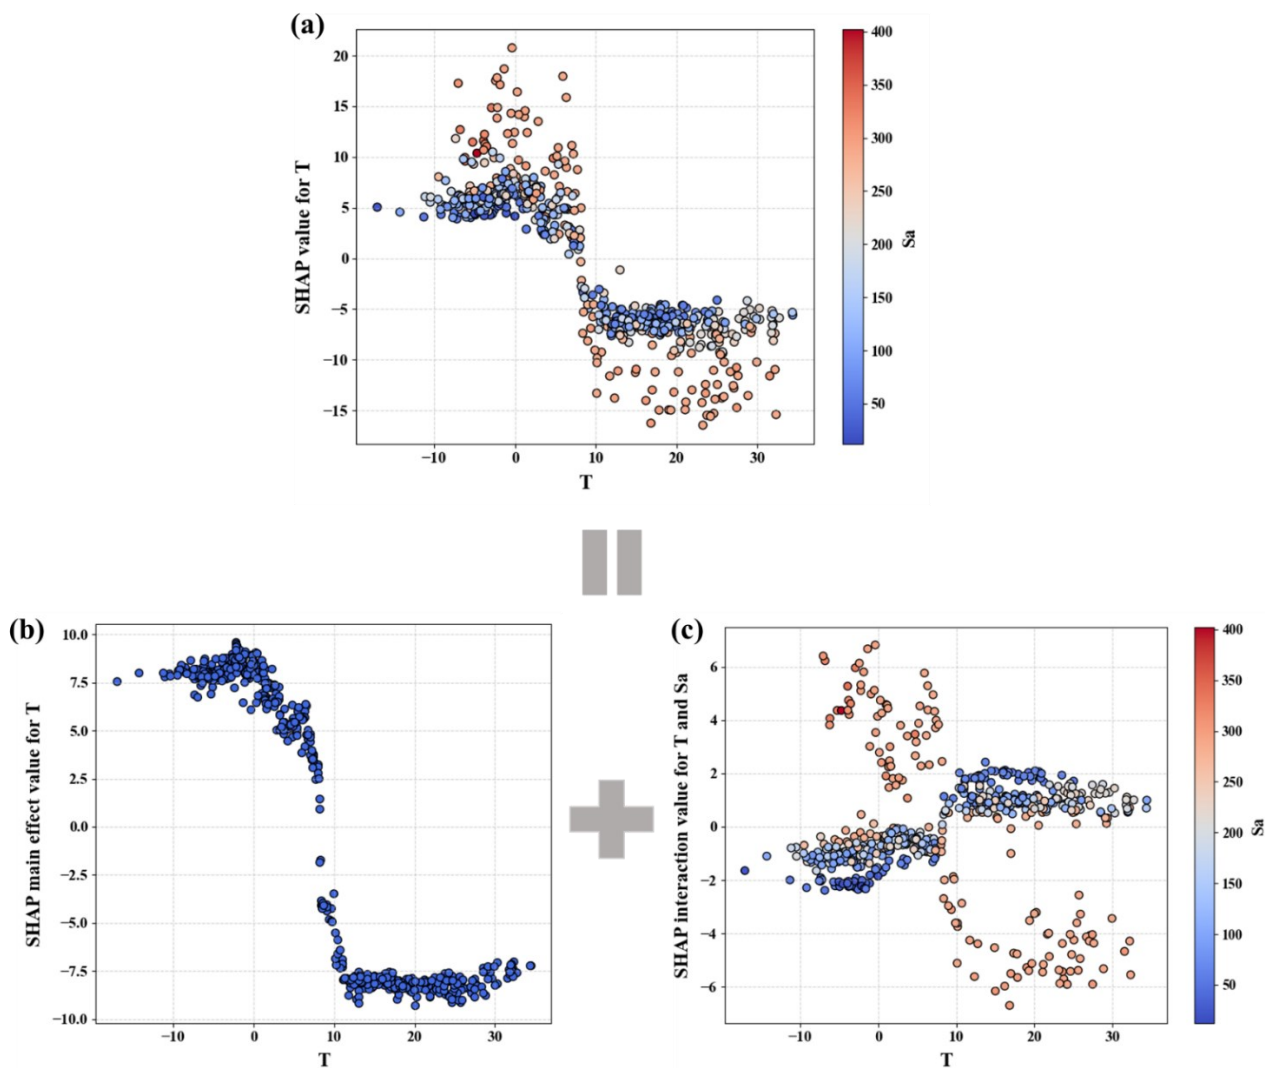

215 Fig. S8. (a) The interaction effect of temperature (T) and aerosol surface area (Sa), (b) the main effects of T on NACs, and (c) the interaction SHAP value between T and Sa shows how the effect of T on NACs varies with Sa.



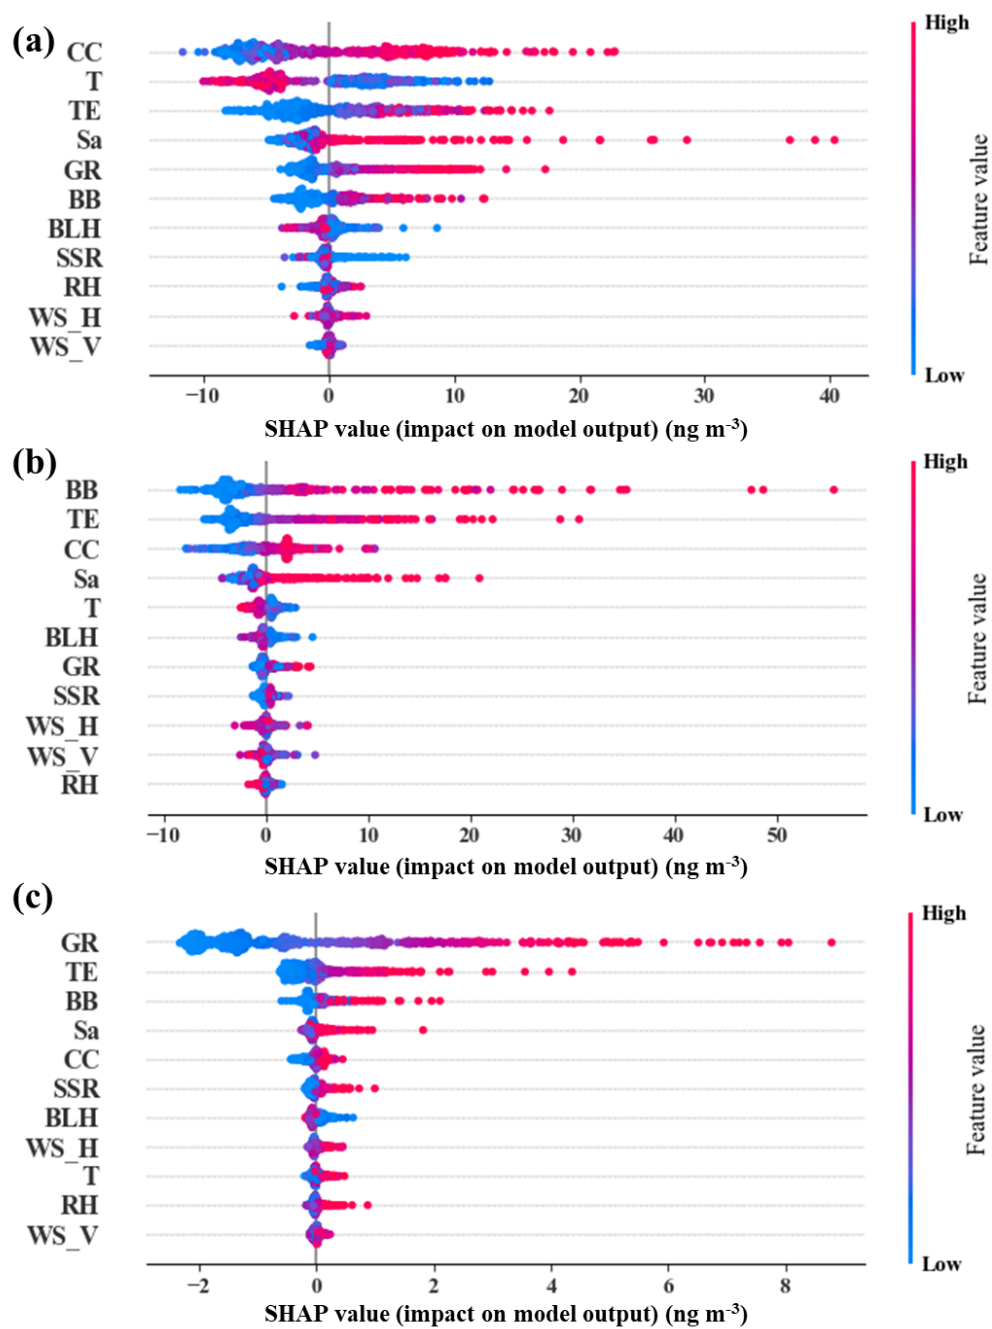

Fig. S9. Summary plots of the SHAP interaction matrix values for (a) NPs, (b) NCs, and (c) NSAs, respectively.

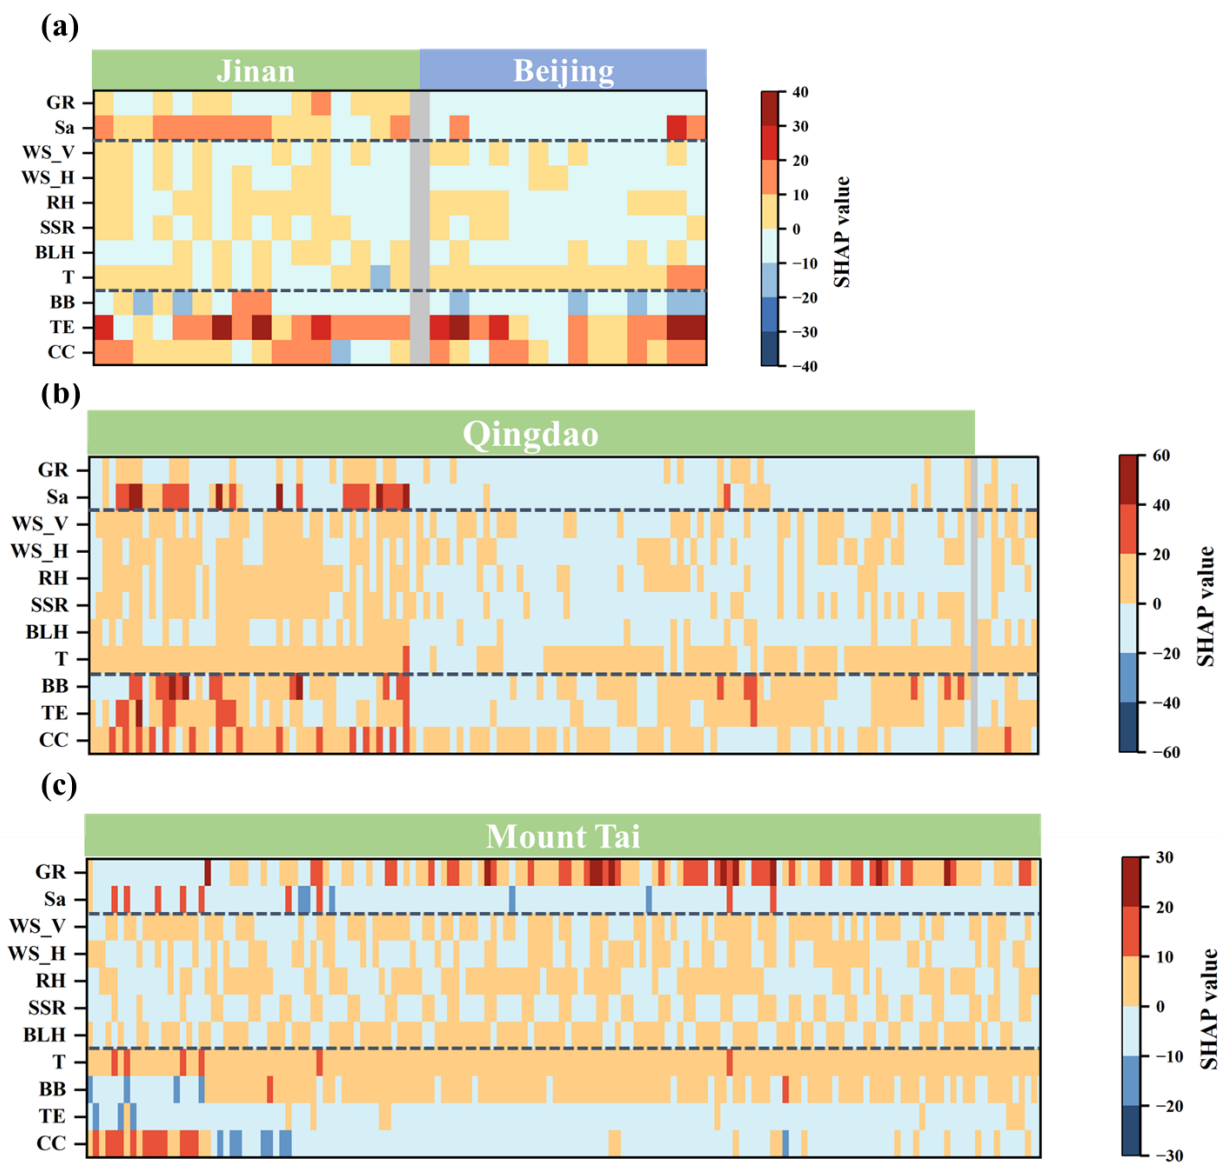

Fig. S10. Heat maps for the contribution of single factor to each sample in the formation and loss of NACs in the (a) urban, (b) rural, and (c) mountain areas in winter.

## References

- Ancona, M., Öztireli, C., and Gross, M.: Explaining Deep Neural Networks with a Polynomial Time Algorithm for Shapley Values Approximation, Proceedings of the 36th International Conference on Machine Learning, 272-281,
- Bi, X., Lin, Q., Peng, L., Zhang, G., Wang, X., Brechtel, F. J., Chen, D., Li, M., Peng, P. a., Sheng, G., and Zhou, Z.: In situ  
225 detection of the chemistry of individual fog droplet residues in the Pearl River Delta region, China, J. Geophys. Res.-  
Atmos., 121, 9105-9116, <https://doi.org/10.1002/2016JD024886>, 2016.
- Breiman, L.: Random Forests, Machine Learning, 45, 5-32, <https://doi.org/10.1023/A:1010933404324>, 2001.
- Cao, X., Hao, X., Shen, X., Jiang, X., Wu, B., and Yao, Z.: Emission characteristics of polycyclic aromatic hydrocarbons and  
nitro-polycyclic aromatic hydrocarbons from diesel trucks based on on-road measurements, Atmos. Environ., 148, 190-  
230 196, <https://doi.org/10.1016/j.atmosenv.2016.10.040>, 2017.
- Chai, T. and Draxler, R. R.: Root mean square error (RMSE) or mean absolute error (MAE)? – Arguments against avoiding  
RMSE in the literature, Geosci. Model Dev., 7, 1247-1250, <https://doi.org/10.5194/gmd-7-1247-2014>, 2014.
- Chen, X., Ma, R., Zhong, W., Sun, B., and Zhou, X.: Numerical study of the effects of temperature and humidity on the  
transport and deposition of hygroscopic aerosols in a G3-G6 airway, Int. J. Heat Mass Transfer, 138, 545-552,  
235 <https://doi.org/10.1016/j.ijheatmasstransfer.2019.04.114>, 2019.
- Claeys, M., Vermeylen, R., Yasmeen, F., Gómez-González, Y., Chi, X., Maenhaut, W., Mészáros, T., and Salma, I.: Chemical  
characterisation of humic-like substances from urban, rural and tropical biomass burning environments using liquid  
chromatography with UV/vis photodiode array detection and electrospray ionisation mass spectrometry, Environ. Chem.,  
9, 273-284, <https://doi.org/10.1071/en11163>, 2012.
- 240 Ding, A. J., Fu, C. B., Yang, X. Q., Sun, J. N., Zheng, L. F., Xie, Y. N., Herrmann, E., Nie, W., Petäjä, T., Kerminen, V. M.,  
and Kulmala, M.: Ozone and fine particle in the western Yangtze River Delta: an overview of 1 yr data at the SORPES  
station, Atmos. Chem. Phys., 13, 5813-5830, <https://doi.org/10.5194/acp-13-5813-2013>, 2013.
- Fatahi, R., Nasiri, H., Dadfar, E., and Chehreh Chelgani, S.: Modeling of energy consumption factors for an industrial cement  
vertical roller mill by SHAP-XGBoost: a "conscious lab" approach, Sci. Rep., 12, 7543, [https://doi.org/10.1038/s41598-  
245 022-11429-9](https://doi.org/10.1038/s41598-022-11429-9), 2022.
- Gui, K., Che, H., Zeng, Z., Wang, Y., Zhai, S., Wang, Z., Luo, M., Zhang, L., Liao, T., Zhao, H., Li, L., Zheng, Y., and Zhang,  
X.: Construction of a virtual PM<sub>2.5</sub> observation network in China based on high-density surface meteorological  
observations using the Extreme Gradient Boosting model, Environ. Int., 141, 105801,  
<https://doi.org/10.1016/j.envint.2020.105801>, 2020.
- 250 Harrison, M. A. J., Barra, S., Borghesi, D., Vione, D., Arsene, C., and Olariu, R. L.: Nitrated phenols in the atmosphere: a  
review, Atmos. Environ., 39, 231-248, <https://doi.org/10.1016/j.atmosenv.2004.09.044>, 2005.

- Hong, Y., Cao, F., Fan, M.-Y., Lin, Y.-C., Bao, M., Xue, Y., Wu, J., Yu, M., Wu, X., and Zhang, Y.-L.: Using machine learning to quantify sources of light-absorbing water-soluble humic-like substances (HULISws) in Northeast China, *Atmos. Environ.*, 291, 119371, <https://doi.org/10.1016/j.atmosenv.2022.119371>, 2022.
- 255 Hou, L., Dai, Q., Song, C., Liu, B., Guo, F., Dai, T., Li, L., Liu, B., Bi, X., Zhang, Y., and Feng, Y.: Revealing Drivers of Haze Pollution by Explainable Machine Learning, *Environ. Sci. Technol. Lett.*, 9, 112-119, <https://doi.org/10.1021/acs.estlett.1c00865>, 2022.
- Iinuma, Y., Böge, O., Gräfe, R., and Herrmann, H.: Methyl-nitrocatechols: atmospheric tracer compounds for biomass burning secondary organic aerosols, *Environ. Sci. Technol.*, 44, 8453-8459, <https://doi.org/10.1021/es102938a>, 2010.
- 260 Ju, Y., Sun, G., Chen, Q., Zhang, M., Zhu, H., and Rehman, M. U.: A Model Combining Convolutional Neural Network and LightGBM Algorithm for Ultra-Short-Term Wind Power Forecasting, *IEEE Access*, 7, 28309-28318, <https://doi.org/10.1109/ACCESS.2019.2901920>, 2019.
- Kang, Y., Choi, H., Im, J., Park, S., Shin, M., Song, C.-K., and Kim, S.: Estimation of surface-level NO<sub>2</sub> and O<sub>3</sub> concentrations using TROPOMI data and machine learning over East Asia, *Environ. Pollut.*, 288, 117711, <https://doi.org/10.1016/j.envpol.2021.117711>, 2021.
- 265 Ke, G., Meng, Q., Finley, T., Wang, T., Chen, W., Ma, W., Ye, Q., and Liu, T.-Y.: Lightgbm: A highly efficient gradient boosting decision tree, *Advances in neural information processing systems*, 30, 3149-3157, <https://doi.org/10.5555/3294996.3295074>, 2017.
- Liu, Z., Li, M., Wang, X., Liang, Y., Jiang, Y., Chen, J., Mu, J., Zhu, Y., Meng, H., Yang, L., Hou, K., Wang, Y., and Xue, L.: Large contributions of anthropogenic sources to amines in fine particles at a coastal area in northern China in winter, *Sci. Total Environ.*, 839, 156281, <https://doi.org/10.1016/j.scitotenv.2022.156281>, 2022.
- 270 Lu, C. Y., Wang, X. F., Li, R., Gu, R. R., Zhang, Y. X., Li, W. J., Gao, R., Chen, B., Xue, L. K., and Wang, W. X.: Emissions of fine particulate nitrated phenols from residential coal combustion in China, *Atmos. Environ.*, 203, 10-17, <https://doi.org/10.1016/j.atmosenv.2019.01.047>, 2019a.
- 275 Lu, C. Y., Wang, X. F., Dong, S. W., Zhang, J., Li, J., Zhao, Y. N., Liang, Y. H., Xue, L. K., Xie, H. J., Zhang, Q. Z., and Wang, W. X.: Emissions of fine particulate nitrated phenols from various on-road vehicles in China, *Environ. Res.*, 179, 108709, <https://doi.org/10.1016/j.envres.2019.108709>, 2019b.
- Petkovic, D., Altman, R., Wong, M., and Vigil, A.: Improving the explainability of Random Forest classifier-user centered approach, in: *Biocomputing 2018*, World Scientific, 204-215, [https://doi.org/10.1142/9789813235533\\_0019](https://doi.org/10.1142/9789813235533_0019), 2017.
- 280 Pham, T. D., Yokoya, N., Nguyen, T. T. T., Le, N. N., Ha, N. T., Xia, J., Takeuchi, W., and Pham, T. D.: Improvement of Mangrove Soil Carbon Stocks Estimation in North Vietnam Using Sentinel-2 Data and Machine Learning Approach, *GISci. Remote Sens.*, 58, 68-87, <https://doi.org/10.1080/15481603.2020.1857623>, 2021.
- Quinn, P. K., Bates, T. S., Coffman, D. J., and Covert, D. S.: Influence of particle size and chemistry on the cloud nucleating properties of aerosols, *Atmos. Chem. Phys.*, 8, 1029-1042, <https://doi.org/10.5194/acp-8-1029-2008>, 2008.

- 285 Reifman, J. and Feldman, E. E.: Multilayer perceptron for nonlinear programming, *Comput. Oper. Res.*, 29, 1237-1250, [https://doi.org/10.1016/S0305-0548\(01\)00027-2](https://doi.org/10.1016/S0305-0548(01)00027-2), 2002.
- Ren, Y., Wei, J., Wu, Z., Ji, Y., Bi, F., Gao, R., Wang, X., Wang, G., and Li, H.: Chemical components and source identification of PM<sub>2.5</sub> in non-heating season in Beijing: The influences of biomass burning and dust, *Atmos. Res.*, 251, 105412, <https://doi.org/10.1016/j.atmosres.2020.105412>, 2021.
- 290 Requia, W. J., Di, Q., Silvern, R., Kelly, J. T., Koutrakis, P., Mickley, L. J., Sulprizio, M. P., Amini, H., Shi, L., and Schwartz, J.: An Ensemble Learning Approach for Estimating High Spatiotemporal Resolution of Ground-Level Ozone in the Contiguous United States, *Environ. Sci. Technol.*, 54, 11037-11047, <https://doi.org/10.1021/acs.est.0c01791>, 2020.
- Schauer, J. J., Kleeman, M. J., Cass, G. R., and Simoneit, B. R. T.: Measurement of emissions from air pollution sources. 5. C<sub>1</sub>–C<sub>32</sub> organic compounds from gasoline-powered motor vehicles, *Environ. Sci. Technol.*, 36, 1169-1180, <https://doi.org/10.1021/es0108077>, 2002.
- 295 Shapley, L.: Classics in Game Theory 7. A Value for n-Person Games. Contributions to the Theory of Games II (1953) 307-317, in, edited by: Kuhn, H. W., Princeton University Press, 69-79, <https://doi.org/10.1515/9781400829156-012>, 1997.
- Simoneit, B. R. T., Bi, X., Oros, D. R., Medeiros, P. M., Sheng, G., and Fu, J.: Phenols and Hydroxy-PAHs (Arylphenols) as Tracers for Coal Smoke Particulate Matter: Source Tests and Ambient Aerosol Assessments, *Environ. Sci. Technol.*, 41, 7294-7302, <https://doi.org/10.1021/es071072u>, 2007.
- 300 Sinclair, D., Countess, R. J., and Hoopes, G. S.: Effect of relative humidity on the size of atmospheric aerosol particles, *Atmos. Environ.*, 8, 1111-1117, [https://doi.org/10.1016/0004-6981\(74\)90045-6](https://doi.org/10.1016/0004-6981(74)90045-6), 1974.
- Spiess, A.-N. and Neumeyer, N.: An evaluation of R<sup>2</sup> as an inadequate measure for nonlinear models in pharmacological and biochemical research: a Monte Carlo approach, *BMC Pharmacol.*, 10, 6, <https://doi.org/10.1186/1471-2210-10-6>, 2010.
- 305 Tham, Y. J., Wang, Z., Li, Q., Yun, H., Wang, W., Wang, X., Xue, L., Lu, K., Ma, N., Bohn, B., Li, X., Kecorius, S., Größ, J., Shao, M., Wiedensohler, A., Zhang, Y., and Wang, T.: Significant concentrations of nitryl chloride sustained in the morning: investigations of the causes and impacts on ozone production in a polluted region of northern China, *Atmos. Chem. Phys.*, 16, 14959-14977, <https://doi.org/10.5194/acp-16-14959-2016>, 2016.
- Tremp, J., Mattrel, P., Fingler, S., and Giger, W.: Phenols and nitrophenols as tropospheric pollutants: Emissions from automobile exhausts and phase transfer in the atmosphere, *Water Air Soil Pollut.*, 68, 113-123, <https://doi.org/10.1007/BF00479396>, 1993.
- 310 Wang, L., Zhao, Y., Shi, J., Ma, J., Liu, X., Han, D., Gao, H., and Huang, T.: Predicting ozone formation in petrochemical industrialized Lanzhou city by interpretable ensemble machine learning, *Environ. Pollut.*, 318, 120798, <https://doi.org/10.1016/j.envpol.2022.120798>, 2023.
- 315 Wang, L., Wang, X., Gu, R., Wang, H., Yao, L., Wen, L., Zhu, F., Wang, W., Xue, L., Yang, L., Lu, K. D., Chen, J., Wang, T., Zhang, Y., and Wang, W.: Observations of fine particulate nitrated phenols in four sites in northern China: concentrations, source apportionment, and secondary formation, *Atmos. Chem. Phys.*, 18, 4349-4359, <https://doi.org/10.5194/acp-18-4349-2018>, 2018.

- Wang, X., Gu, R., Wang, L., Xu, W., Zhang, Y., Chen, B., Li, W., Xue, L., Chen, J., and Wang, W.: Emissions of fine  
 320 particulate nitrated phenols from the burning of five common types of biomass, *Environ. Pollut.*, 230, 405-412,  
<https://doi.org/10.1016/j.envpol.2017.06.072>, 2017a.
- Wang, X., Wang, H., Xue, L., Wang, T., Wang, L., Gu, R., Wang, W., Tham, Y. J., Wang, Z., and Yang, L.: Observations of  
 $\text{N}_2\text{O}_5$  and  $\text{ClNO}_2$  at a polluted urban surface site in North China: High  $\text{N}_2\text{O}_5$  uptake coefficients and low  $\text{ClNO}_2$  product  
 yields, *Atmos. Environ.*, 156, 125-134, <https://doi.org/10.1016/j.atmosenv.2017.02.035>, 2017b.
- 325 Wang, Z., Wang, W., Tham, Y. J., Li, Q., Wang, H., Wen, L., Wang, X., and Wang, T.: Fast heterogeneous  $\text{N}_2\text{O}_5$  uptake and  
 $\text{ClNO}_2$  production in power plant and industrial plumes observed in the nocturnal residual layer over the North China  
 Plain, *Atmos. Chem. Phys.*, 17, 12361-12378, <https://doi.org/10.5194/acp-17-12361-2017>, 2017c.
- Wu, X., Cao, F., Haque, M., Fan, M. Y., Zhang, S. C., and Zhang, Y. L.: Molecular composition and source apportionment of  
 fine organic aerosols in Northeast China, *Atmos. Environ.*, 239, 117722, <https://doi.org/10.1016/j.atmosenv.2020.117722>,  
 330 2020.
- Yao, L., Yang, L., Chen, J., Wang, X., Xue, L., Li, W., Sui, X., Wen, L., Chi, J., Zhu, Y., Zhang, J., Xu, C., Zhu, T., and Wang,  
 W.: Characteristics of carbonaceous aerosols: Impact of biomass burning and secondary formation in summertime in a  
 rural area of the North China Plain, *Sci. Total Environ.*, 557-558, 520-530,  
<https://doi.org/10.1016/j.scitotenv.2016.03.111>, 2016.
- 335 Yuan, W., Huang, R., Yang, L., Wang, T., Duan, J., Guo, J., Ni, H., Chen, Y., Chen, Q., Li, Y., Dusek, U., O'Dowd, C., and  
 Hoffmann, T.: Measurement report:  $\text{PM}_{2.5}$ -bound nitrated aromatic compounds in Xi'an, Northwest China – seasonal  
 variations and contributions to optical properties of brown carbon, *Atmos. Chem. Phys.*, 21, 3685-3697,  
<https://doi.org/10.5194/acp-21-3685-2021>, 2021.
- Zhang, Q., Gao, R., Xu, F., Zhou, Q., Jiang, G., Wang, T., Chen, J., Hu, J., Jiang, W., and Wang, W.: Role of Water Molecule  
 340 in the Gas-Phase Formation Process of Nitrated Polycyclic Aromatic Hydrocarbons in the Atmosphere: A Computational  
 Study, *Environ. Sci. Technol.*, 48, 5051-5057, <https://doi.org/10.1021/es500453g>, 2014.
- Zhang, Y., Sun, J., Zheng, P., Chen, T., Liu, Y., Han, G., Simpson, I. J., Wang, X., Blake, D. R., Li, Z., Yang, X., Qi, Y.,  
 Wang, Q., Wang, W., and Xue, L.: Observations of  $\text{C}_1\text{-C}_5$  alkyl nitrates in the Yellow River Delta, northern China: Effects  
 of biomass burning and oil field emissions, *Sci. Total Environ.*, 656, 129-139,  
 345 <https://doi.org/10.1016/j.scitotenv.2018.11.208>, 2019.
